# Supplementary material for: Chlorine Dioxide Treatment Modulates Ripening-Related Genes and Antioxidant System to Improve the Storability of Tomato
Source: Hindawi journal article supplement (doi:10.1155/2022/3818269), 2022-12-06
Supplement: f1 [file 3818269.f1.docx]

**Table S1.** Primer sequences for quantitative RT-PCR amplification.

| **Gene** | **Accession** | **Primer sequences (5'-3')** | |
| --- | --- | --- | --- |
|  |  | **Forward** | **Reverse** |
| *Actin* | AB199316 | AAGGATGCGTATGTGGGTGA | TTAAGGGGTGCCTCAGTCAG |
| *EF1* | XM_004240531 | TTGTGACCTTTGGCCCTACT | ATGATGACCTGGGCAGTGAA |
| *PE1* | X74638 | GCAGTCGGCCAAGGATTTATAC | GCACCAGGTCCATTGTTCATAA |
| *Glucanase* | NP_001299819 | GCGCATTCAAAGCTCCATGAT | TCTGCCCTAGCATGTGTTTCT |
| *PL* | Solyc03g111690 | GAAGTGCTGATCCCACTATCAA | TGCATCCTCGTGCTTTGT |
| *ERF.B3* | Solyc05g052030 | CGGAGATAAGAGATCCAAGTCGAA | CTTAAACGCTGCACAATCATAAGC |
| *ERF.C1* | Solyc05g051200 | GCATTATCAATGAGGGGTCCTTG | TTAAAACAGCAGCTGGAGATAATCC |
| *ERF.E1* | Solyc09g075420 | GTTCCTCTCAACCCCAAACG | TTCATCTGCTCACCACCTGTAGA |
| *APX* | AF413573 | TAAGGAGCTGTTGAAGGCCA | GGCTGGAGAAGTTTCAGTGC |
| *CAT* | M93719 | GAGAAGCTCGCGACATTTGA | GCAAAACCACGAATGTCCCT |
| *Peroxidase 42* | XM_004232664 | TGCTTCCTTGTTGCTGGACT | GAGAGGAATGTGTGGCCCTC |


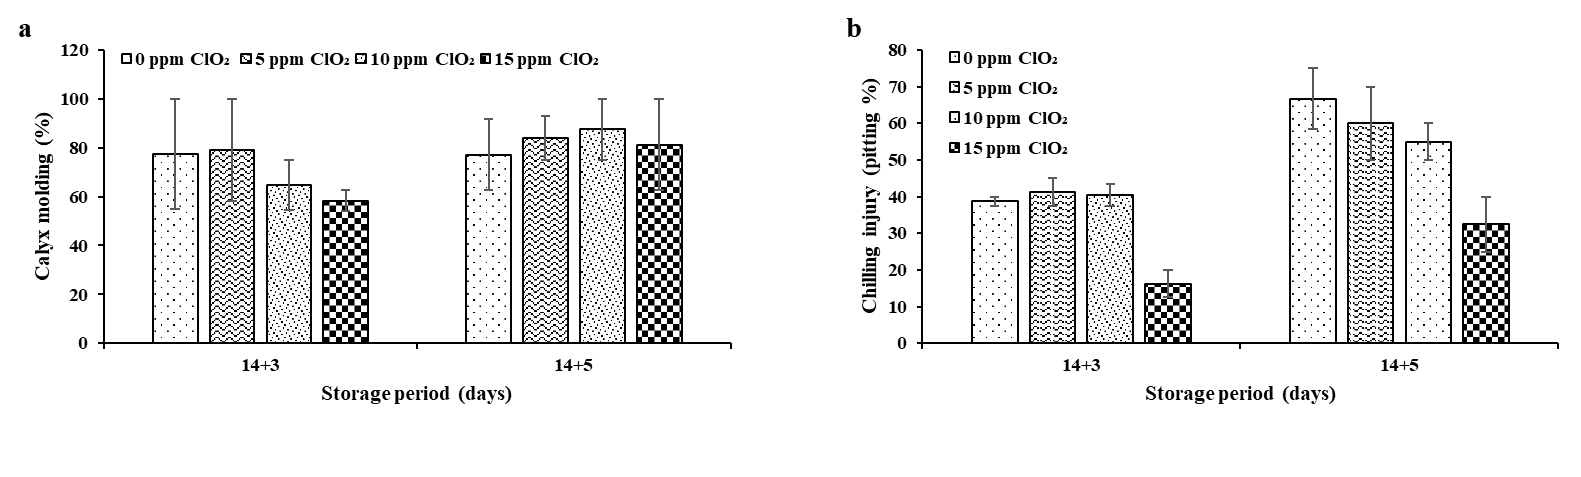


**Fig S1**. Effect of ClO2 treatment on expression on calyx molding (a) and chilling injury (b) in tomato stored at 4 °C for 14 days followed by 5 days at 20 °C. The bar represents the mean ± standard error of three biological replicates.


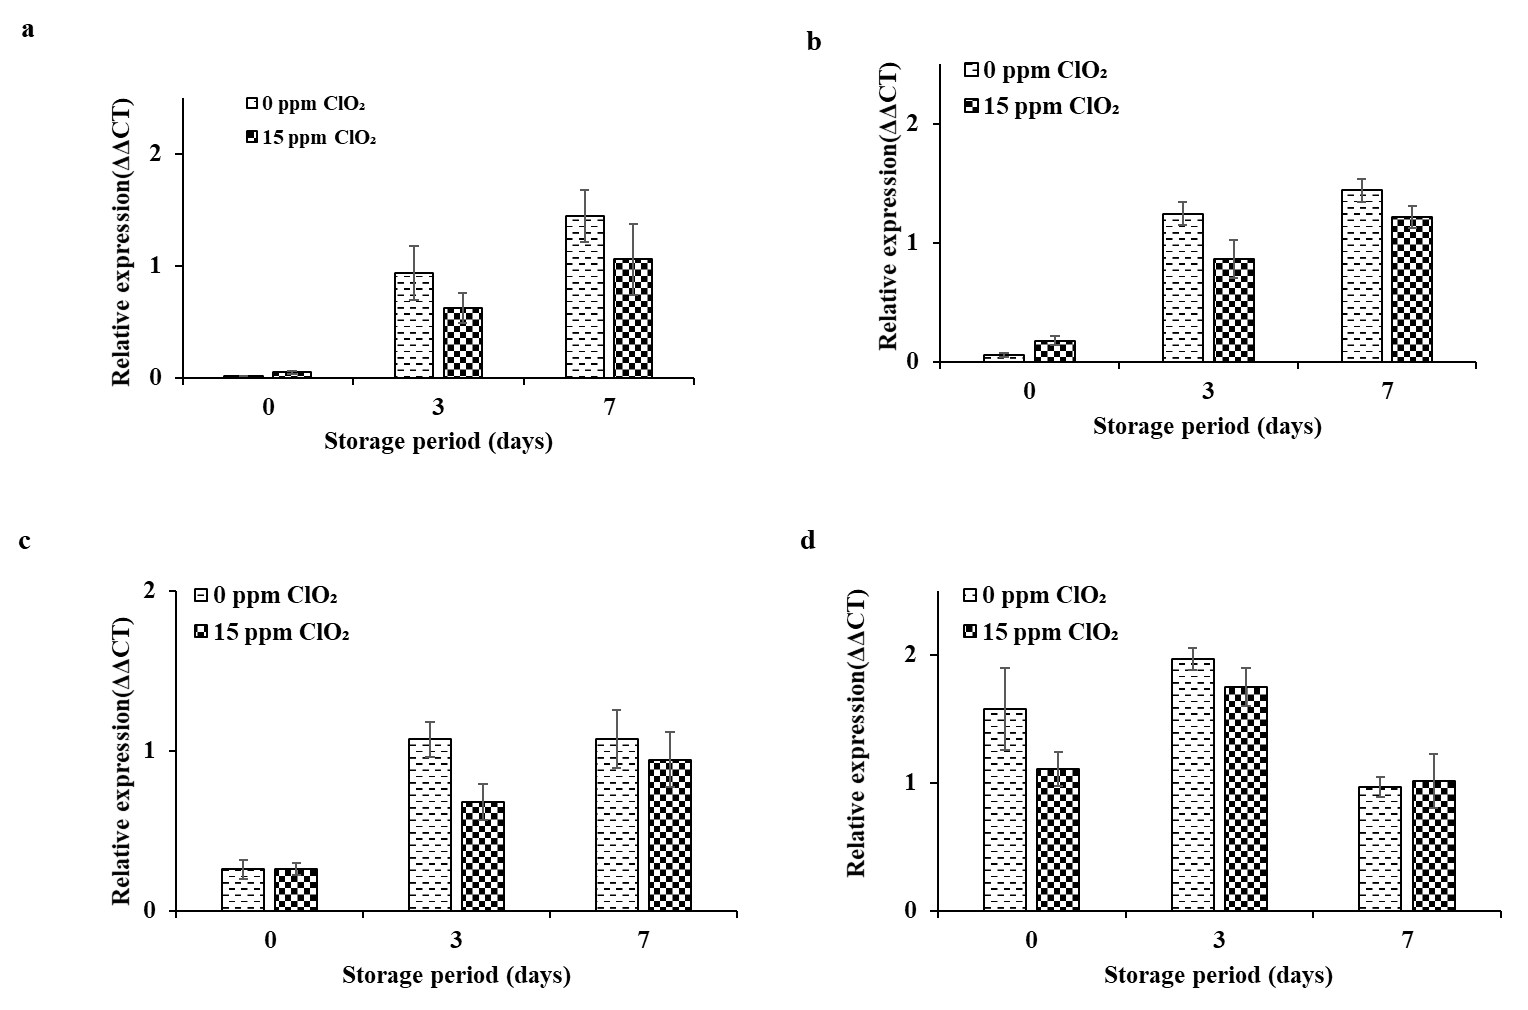


**Fig S2**. Effect of ClO2 treatment on expression of *ACC synthase* *(ACS) 2* and *ACS4* genes in tomatoes at mature green (a and b) and breaker stage (c and d) tomatoes. The bar represents the mean ± standard error of three biological replicates.
